# Supplementary material for: Drp1-mediated mitochondrial fission promotes renal fibroblast activation and fibrogenesis
Source: PubMed Central journal article supplement (PMC6965618; doi:10.1038/s41419-019-2218-5), 2020-01-16
Supplement: 41419_2019_2218_MOESM4_ESM.pdf [file 41419_2019_2218_MOESM4_ESM.pdf]

Please complete the table below to indicate the contributions of all named authors to the figures.

Figure 1:

|  |
|--|
|  |
|--|

Figure 2:

|  |
|--|
|  |
|--|

Figure 3:

|  |
|--|
|  |
|--|

Figure 4:

|  |
|--|
|  |
|--|

Figure 5:

|  |
|--|
|  |
|--|

Figure 6:

|  |
|--|
|  |
|--|

Signed for and on behalf of the Author(s):

Print Name:

Date:
